1        **Unisexual reproduction promotes competition for mating partners in the**  
2        **global human fungal pathogen *Cryptococcus deneoformans***

3

4

5

6

**Ci Fu, Torin P. Thielhelm, and Joseph Heitman<sup>1</sup>**

7

**1** Department of Molecular Genetics and Microbiology, Duke University Medical  
Center, Durham, NC, 27710, USA

8

9

10

11

12

13

14

15

16

17        **Corresponding author:**

18        Joseph Heitman, MD, PhD

19        Department of Molecular Genetics and Microbiology

20        Duke University Medical Center

21        322 CARL Building Box 3546

22        Durham, NC 27710, USA

23        Tel: 919-684-2824

24        Fax: 919-684-2790

25        Email: [heim001@duke.edu](mailto:heim001@duke.edu)

26

27        **Running title:** Foraging for mating in *Cryptococcus deneoformans*

28 **Abstract**

29 Courtship is pivotal for successful mating. However, courtship is challenging  
30 for the *Cryptococcus neoformans* species complex, comprised of opportunistic  
31 fungal pathogens, as the majority of isolates are  $\alpha$  mating type. In the absence of  
32 mating partners of the opposite mating type, *C. deneoformans* can undergo  
33 unisexual reproduction, during which a yeast-to-hyphal morphological transition  
34 occurs. Hyphal growth during unisexual reproduction is a quantitative trait, which  
35 reflects a strain's ability to undergo unisexual reproduction. In this study, we  
36 determined whether unisexual reproduction confers an ecological benefit by  
37 promoting foraging for mating partners. Through competitive mating assays using  
38 strains with different abilities to produce hyphae, we showed that unisexual  
39 reproduction potential did not enhance competition for mating partners of the same  
40 mating type, but when cells of the opposite mating type were present, cells with  
41 enhanced hyphal growth were more competitive for mating partners of either the  
42 same or opposite mating type. Enhanced mating competition was also observed  
43 in a strain with increased hyphal production that lacks the mating repressor gene  
44 *GPA3*, which contributes to the pheromone response. Hyphal growth in unisexual  
45 strains also enables contact between adjacent colonies and enhances mating  
46 efficiency during mating confrontation assays. The pheromone response pathway  
47 activation positively correlated with unisexual reproduction hyphal growth during  
48 bisexual mating and exogenous pheromone promoted bisexual cell fusion. Despite  
49 the benefit in competing for mating partners, unisexual reproduction conferred a  
50 fitness cost. Taken together, these findings suggest *C. deneoformans* employs

51 hyphal growth to facilitate contact between colonies at long distances and utilizes

52 pheromone sensing to enhance mating competition.

53

## 54 **Author Summary**

55           Sexual reproduction plays a pivotal role in shaping fungal population  
56 structure and diversity in nature. The global human fungal pathogen  
57 *Cryptococcus neoformans* species complex evolved distinct sexual cycles:  
58 bisexual reproduction between mating partners of the opposite mating types, and  
59 unisexual reproduction with only one mating type. During both sexual cycles,  
60 cells undergo a yeast-to-hyphal morphological transition and nuclei diploidize  
61 through either cell-cell fusion followed by nuclear fusion during bisexual  
62 reproduction or endoreplication during unisexual reproduction. Despite the  
63 complex sexual life cycle, the majority of Cryptococcal isolates are  $\alpha$  mating type.  
64 Albeit the scarcity of *MAT $\alpha$*  cells in the environment, meiotic recombination is  
65 prevalent. To decipher this conundrum, we ask whether there is an underlying  
66 mechanism in which *Cryptococcus* species increase their mating opportunities. In  
67 this study, we showed that the undirected hyphal growth during unisexual  
68 reproduction enables *MAT $\alpha$*  cells to forage for mating partners over a larger  
69 surface area, and when *MAT $\alpha$*  hyphae come into close proximity of rare *MAT $\alpha$*   
70 cells, pheromone response pathway activation in both *MAT $\alpha$*  and *MAT $\alpha$*  cells can  
71 further enhance mating. This mating enhancement could promote outcrossing  
72 and facilitate genome reshuffling via meiotic recombination.

73

## 74 Introduction

75           Successful courtship is key to the evolutionary success of sexual  
76 organisms, and many species have evolved distinct strategies to locate and  
77 choose a mating partner. For example, primates and humans utilize aggression  
78 to secure a mating partner [1]; male hummingbirds apply acoustic control using  
79 tail feathers during high-speed dives to court females [2]; male *Drosophila* vibrate  
80 their wings to generate different songs to trigger mating responses in females [3];  
81 male tree-hole frogs also adopt acoustic strategies taking advantage of tree trunk  
82 cavities to attract females [4]; and female pipefish display a temporal striped  
83 pattern ornament to woo male partners [5]. These examples demonstrate that  
84 complex eukaryotic organisms can employ visual, vocal, or mechanical tactics to  
85 secure a mate and transmit their genetic traits to the next generation.

86

87           In eukaryotic fungal systems, mating often involves a morphological  
88 transition. *Saccharomyces cerevisiae* yeast cells undergo polarized growth and  
89 form shmoo projections in preparation for cell fusion during mating [6]. In  
90 filamentous fungi, including both ascomycetes and basidiomycetes, sexual  
91 reproduction involves the formation of a fruiting body (perithecium or basidium,  
92 respectively) [7]. *Candida albicans*, an ascomycete, undergoes a white-opaque  
93 switch to initiate mating [8]. Despite their divergent sexual strategies, these  
94 morphological transitions are all controlled by the pheromone response pathway  
95 [9]. During yeast mating, physical agglutination of yeast cells does not promote  
96 courtship, but rather a gradient of pheromone signals is crucial for successful

97 cell-cell fusion during early mating [10, 11]. Similarly, in *Schizosaccharomyces*  
98 *pombe*, local pheromone signals and a spatially focal pheromone response  
99 dictate cell-cell pairing and fusion position during early mating processes [12, 13].  
100 In *C. albicans*, overexpression of the pheromone response MAP kinase pathway  
101 components can enhance mating efficiency [14]. These studies establish that the  
102 pheromone response pathway plays a critical role in promoting fungal mating  
103 efficiency.

104

105 The opportunistic human fungal pathogen *Cryptococcus deneoformans*  
106 undergoes a yeast-to-hyphal morphological transition upon mating induction [15].  
107 This species has two modes of sexual reproduction: bisexual reproduction  
108 between cells of opposite mating types and unisexual reproduction involving cells  
109 of only one mating type [15-17]. Cell fusion between *MAT<sub>a</sub>* and *MAT<sub>α</sub>* cells  
110 during bisexual reproduction, and between two *MAT<sub>α</sub>* cells during unisexual  
111 reproduction, triggers hyphal development [18]. This morphological transition is  
112 orchestrated by the pheromone response pathway [18, 19]. However, recent  
113 studies have shown that hyphal growth during unisexual reproduction can also  
114 occur independent of cell fusion and the pheromone response pathway [20-23],  
115 and that pheromone-independent hyphal development is dependent upon the  
116 calcineurin pathway [20, 24].

117

118           Because the majority of identified natural and clinical *C. neoformans*  
119 isolates are of the  $\alpha$  mating type, unisexual reproduction likely has significant  
120 ecological impacts on the *Cryptococcus* species complex population structure  
121 and diversity [25-27]. The limited abundance of *MATa* cells in natural  
122 environments restricts outcrossing and in the absence of **a**- $\alpha$  mating, unisexual  
123 reproduction has been shown to reverse Muller's ratchet and offset the low  
124 abundance of *MATa* cells to avoid an evolutionary dead end [28]. Unisexual  
125 reproduction can also generate genotypic and phenotypic diversity *de novo* [29].  
126 Interestingly, population genetics studies have revealed that genome  
127 recombination occurs frequently among environmental isolates [30-32], even  
128 those that are exclusively  $\alpha$  mating type, providing evidence that unisexual  
129 reproduction involving fusion of *MAT* $\alpha$  cells of distinct genotypes allows meiotic  
130 recombination in nature. Despite these evolutionary benefits, cell fusion-  
131 independent solo-unisexual reproduction also occurs and because this pathway  
132 involves genetically identical genomes, it does not contribute to genome  
133 reshuffling or recombination. Similar to pseudohyphal differentiation in *S.*  
134 *cerevisiae*, *C. deneoformans* hyphal growth during unisexual reproduction has an  
135 ecological benefit in promoting foraging for nutrients and habitat exploration in  
136 the surrounding environments [33, 34]. In this study, we address whether the  
137 ability to undergo unisexual reproduction has an additional ecological benefit in  
138 promoting foraging for mating partners to facilitate outcrossing and enable  
139 recombination in nature.

140

141 **Results and Discussion**

142 **Strains with enhanced unisexual reproduction potential are more**  
143 **competitive for mating partners of the opposite mating type**

144 During *C. deneoformans* solo-unisexual reproduction, cells undergo the  
145 yeast-to-hyphal morphological transition independent of cell fusion and nuclei  
146 diploidized through endoreplication [16, 23]. The hyphal growth is a quantitative  
147 trait associated with unisexual reproduction that can be used to determine a  
148 strain's ability to undergo unisexual reproduction [35]. Although solo-unisexual  
149 reproduction occurs independently of cell-cell fusion, cells can fuse with partners  
150 of both the same or opposite mating type at varying frequencies [16, 23]. To test  
151 whether the ability to undergo unisexual reproduction impacts competition for  
152 mating partners during outcrossing, we performed mating competition  
153 experiments employing three *MAT $\alpha$*  and three *MATa* *C. deneoformans* strains  
154 with different degrees of unisexual reproduction potential based on their abilities  
155 to produce hyphae (Figure 1A) [35]. Among these strains, several were F2  
156 progeny derived from crosses between the environmental *MATa* isolate NIH433  
157 and the clinical *MAT $\alpha$*  isolate NIH12 including a high hyphal (HH) strain XL190 $\alpha$ ,  
158 an intermediate hyphal (MH) strain XL280 $\alpha$ , a low hyphal strain XL187a, and a  
159 no hyphal (NH) strain JEC20a [15, 16, 36-38]. LH strain JEC21 $\alpha$  and MH strain  
160 XL280a are congeneric strains of JEC20a and XL280 $\alpha$ , respectively, derived  
161 through 10 rounds of backcrossing (Figure S1) [36, 38, 39]. For each mating  
162 competition experiment, cells of three strains with different hyphal growth  
163 carrying dominant, selectable drug resistance markers were mixed, spot-



164 inoculated, and incubated on V8 agar media for 4 days (Figure 1B). Cells were  
165 recovered on YPD medium to obtain colony forming units (CFU), and on YPD  
166 medium supplemented with different two-drug combinations to determine the cell  
167 fusion frequencies. Cell fusion frequencies were compared between different  
168 pairs of strains within the same competition mating mixture to determine whether  
169 the ability to undergo unisexual reproduction confers benefits in competition for  
170 mating partners to facilitate outcrossing (Figure 1B).

171         Prior to the mating competition experiments, cell fusion frequencies were  
172 compared between different hyphal strains. During  $\alpha$ - $\alpha$  cell fusion, the *MAT $\alpha$*  MH  
173 strain displayed a significantly higher cell fusion frequency (5 cell fusion events  
174 per million CFU) compared to the HH and LH strains (0.013 and 0.019 cell fusion  
175 events per million CFU, respectively), in which cell fusion rarely occurred (Figure  
176 1C). This suggests that the ability to undergo more robust hyphal growth is not  
177 strictly correlated with  $\alpha$ - $\alpha$  cell fusion efficiency. In contrast, during **a**- $\alpha$  cell fusion,  
178 hyphal growth positively correlated with **a**- $\alpha$  cell fusion efficiency. MH-HH strains  
179 had a cell fusion frequency (53 cell fusion events per thousand CFU) about 109  
180 times higher than LH-MH strains, which in turn had a cell fusion frequency (0.49  
181 cell fusion events per thousand CFU) about 26 times higher than NH-LH strains  
182 (0.019 cell fusion events per thousand CFU) (Figure 1D). In all of the strains  
183 tested, **a**- $\alpha$  cell fusion occurred at a much higher level compared to  $\alpha$ - $\alpha$  cell  
184 fusion, similar to previous findings [16, 23].

185         Cell fusion has been previously shown to be dispensable for solo-  
186 unisexual reproduction [19, 23], which can account for the observed poor

187 correlation between hyphal growth and  $\alpha$ - $\alpha$  cell fusion frequency. Thus, we  
188 hypothesize that increased hyphal growth may not provide an advantage in  
189 competing for mating partners of the same mating type. Indeed, when we  
190 performed the unisexual mating competition assay mixing the HH, MH, and LH  
191 cells, we observed that HH and LH cells yielded the most fusion products with a  
192 cell fusion frequency of 1.3 cell fusion events per million CFU that is not  
193 significantly different from cell fusion frequencies involved MH cells (Figure 1E)  
194 that exhibited the highest cell fusion frequency (Figure 1C). These findings  
195 indicate that neither  $\alpha$ - $\alpha$  cell fusion frequency nor hyphal growth can be used to  
196 predict mating partner preference during unisexual reproduction, which supports  
197 the hypothesis that the ability to undergo unisexual reproduction does not  
198 promote competition for mating partners of the same mating type.

199       To test whether the propensity for unisexual reproduction plays a role in  
200 competing for mating partners of the opposite mating type, mating competition  
201 assays were conducted for a given *MATa* isolate between two *MAT $\alpha$*  strains of  
202 different hyphal growth phenotypes (Figure 2A). Interestingly, cells capable of  
203 producing more hyphae always had a significantly higher cell fusion frequency  
204 with *MATa* cells compared to cells with lower hyphal growth potential (Figure 2A,  
205 Table S1). For example, in the presence of MH *MATa* cells, HH *MAT $\alpha$*  cells fused  
206 with *MATa* cells 24 times more efficiently than LH *MAT $\alpha$*  cells and 8.1 times more  
207 efficiently than MH *MAT $\alpha$*  cells, and MH *MAT $\alpha$*  cells fused with *MATa* cells 5.8  
208 times more efficiently than LH *MAT $\alpha$*  cells (Table S1). These results suggest that  
209 increased hyphal growth correlates with competition for mating partners of the

210 opposite mating type during bisexual reproduction. It was also noted that the  
211 mating competition advantage decreased for each competition pair (24, 14.5, and  
212 8.9 fold differences for HH vs LH, 8.1, 6.5, and 5.3 fold differences for HH vs MH,  
213 and 5.8, 4.6, and 1.7 fold differences for MH vs LH) with the decreasing hyphal  
214 phenotype of the *MATa* cells (Figure 2A and Table S1), suggesting that  
215 increased hyphal growth of *MATa* cells can also promote cell fusion.

216 Besides the observation that hyphal growth enhanced competition for  
217 mating partners of the opposite mating type, the presence of higher hyphal *MATa*  
218 cells also stimulated **a**- $\alpha$  cell fusion. MH *MATa* and HH *MATa* cells fused at a  
219 frequency of 52 cell fusion events per thousand CFU in the presence of MH  
220 *MATa* cells compared to 10 cell fusion events per thousand CFU in the presence  
221 of LH *MATa* cells (5.2-fold) (Dark yellow-shaded cells in Table S1). MH *MATa*  
222 and MH *MATa* cells fused at a frequency of 6.4 cell fusion events per thousand  
223 CFU in the presence of HH *MATa* cells compared to 3.4 cell fusion events per  
224 thousand CFU in the presence of LH *MATa* cells (1.9-fold) (Dark blue-shaded  
225 cells in Table S1). Similar trends were observed during competition for LH *MATa*  
226 cells in that the presence of MH *MATa* cells increased LH *MATa* and HH *MATa*  
227 cell fusion frequency by 4.5-fold compared to the presence of LH *MATa* cells  
228 (Medium yellow-shaded cells in Table S1), and the presence of HH *MATa* cells  
229 increased LH *MATa* and MH *MATa* cell fusion frequency by 2.2-fold compared to  
230 the presence of LH *MATa* cells (Medium blue-shaded cells in Table S1).  
231 However, cell fusion frequencies between *MATa* cells and LH *MATa* cells were  
232 comparable in the presence of HH or MH *MATa* cells (0.41 or 0.59 cell fusion

233 events per thousand CFU for MH *MATa* cells, and 0.02 or 0.02 cell fusion events  
234 per thousand CFU for LH *MATa* cells) (Dark and medium green-shaded cells in  
235 Table S1). Interestingly, no enhancement of cell fusion frequency by high hyphal  
236 *MAT $\alpha$*  cells was observed during competition for NH *MATa* cells (light color-  
237 shaded cells in Table S1). Notably, the enhancement of cell fusion frequency by  
238 higher hyphal *MAT $\alpha$*  cells did not occur when either *MATa* NH or *MAT $\alpha$*  LH cells  
239 were involved in  $\alpha$ - $\alpha$  cell fusion, suggesting that strains with poor unisexual  
240 reproduction potential have a disadvantage in competing for mating partners of  
241 the opposite mating type.

242

243 The ability to undergo unisexual reproduction also correlated with cell  
244 fusion between cells of the same mating type when a *MATa* partner is present. In  
245 the presence of MH or LH *MATa* cells, HH and MH *MAT $\alpha$*  cells fused at higher  
246 frequencies (26 and 27 cell fusion events per million CFU, respectively)  
247 compared to HH and LH *MAT $\alpha$*  cells (8.1 and 3.4 cell fusion events per million  
248 CFU, respectively), and in the presence of MH, or LH, or NH *MATa* cells, HH and  
249 LH *MAT $\alpha$*  cells fused at higher frequencies (8.1, 3.4, and 2.8 cell fusion events  
250 per million CFU, respectively) compared to MH and LH *MAT $\alpha$*  cells (0.71, 0.28,  
251 and 0.14 cell fusion events per million CFU, respectively) (Figure 2B), suggesting  
252 that increased hyphal growth correlated with enhanced  $\alpha$ - $\alpha$  cell fusion frequency  
253 in the presence of *MATa* cells. We also observed a trend where  $\alpha$ - $\alpha$  cell fusion  
254 frequencies (HH and MH, HH and LH, and MH and LH) decreased with reduced  
255 hyphal *MATa* cells (Figure 2B), suggesting that the presence of more robust

256 hyphal *MATa* cells can further enhance  $\alpha$ - $\alpha$  cell fusion. In summary, strains with  
257 robust hyphal production have an advantage in competing for mating partners of  
258 the opposite mating type, and also for mating partners of the same mating type  
259 when cells of the opposite mating type are present.

260

261 ***gpa3* $\Delta$  mutation enhances competition for mating partners of the same or**  
262 **opposite mating type**

263 The pheromone response pathway plays an important role in the yeast-to-  
264 hyphal morphological transition during *C. deneoformans* sexual reproduction.  
265 This signaling cascade is controlled by G proteins and RGS proteins, including  
266 the G $\alpha$  protein Gpa3 which represses hyphal growth during mating [40-43]. To  
267 further examine the impact of the ability to undergo unisexual reproduction during  
268 mating competition, we generated strains enhanced for hyphal production by  
269 deleting the *GPA3* gene in the LH strain JEC21 $\alpha$ . *gpa3* $\Delta$  mutants exhibited  
270 significantly increased hyphal growth during both unisexual and bisexual  
271 reproduction compared to the parental strain (Figure 3A). Next, mating  
272 competition assays were conducted using the enhanced hyphal (EH) strain  
273 JEC21 $\alpha$  *gpa3* $\Delta$  to test its ability to compete for mating partners.

274

275 Similar to the observation in HH, MH, and LH strains, enhanced hyphal  
276 production did not increase cell fusion between *MAT $\alpha$*  cells but did increase cell  
277 fusion frequency by 4-fold between *MATa* and *MAT $\alpha$*  cells compared to the

278 parental LH strain (Figure 3B, C). However, the increase is not statistically  
279 significant due to the low cell fusion frequencies between strains of low hyphal  
280 background. Unisexual mating competition assays were performed to compare  
281 the abilities of LH and EH *MAT $\alpha$*  cells to fuse with MH *MAT $\alpha$*  cells. In the control  
282 assay, cell fusion frequencies were comparable between cells of all three strain  
283 combinations (MH with LH-*NAT*, MH with LH-*NEO*, and LH-*NAT* with LH-*NEO*)  
284 (Figure 3D). In the assay mixing LH, MH, and EH cells, EH cells fused with MH  
285 cells at a significantly higher frequency of 2.8 cell fusion events per million CFU  
286 compared to LH cells (85-fold) (Figure 3E), suggesting that deletion of *GPA3*  
287 increases competitiveness for mating partners of the same mating type. In the  
288 mating competition during bisexual reproduction, no advantage was observed in  
289 the fusion of NH *MAT $\alpha$*  cells with either EH or the parental LH *MAT $\alpha$*  cells (Figure  
290 3G). However, a significant 2.9-fold increase was observed in total  $\alpha$ - $\alpha$  cell fusion  
291 events during mating competitions for NH *MAT $\alpha$*  cells between EH and LH *MAT $\alpha$*   
292 cells compared to control mating competitions for the same *MAT $\alpha$*  cells between  
293 LH-*NAT* and LH-*NEO* *MAT $\alpha$*  cells (Figure 3F-3G), indicating that presence of  
294 cells with enhanced ability to undergo unisexual reproduction allows both EH and  
295 LH *MAT $\alpha$*  cells to fuse with *MAT $\alpha$*  mating partners more efficiently during  
296 bisexual reproduction. A significant 2.9-fold increase was observed in  $\alpha$ - $\alpha$  cell  
297 fusion between EH and LH *MAT $\alpha$*  cells in the presence of NH *MAT $\alpha$*  cells  
298 compared to cell fusion between LH-*NAT* and LH-*NEO* *MAT $\alpha$*  cells (Figure 3H),  
299 suggesting that in the presence of *MAT $\alpha$*  cells, *GPA3* deletion also enhances  
300 competition for mating partners of the same mating type. Overall, this analysis of

301 the enhanced hyphal growth strain JEC21 $\alpha$  *gpa3* $\Delta$  provides additional support for  
302 models in which increased unisexual reproduction potential enhances  
303 competition for mating partners.

304

### 305 **Hyphal growth promotes foraging for mating partners**

306 Unisexual reproduction provides evolutionary and ecological benefits for  
307 *C. deneoformans* by generating aneuploid progeny with phenotypic diversity and  
308 by promoting habitat exploration through hyphal growth [29, 34]. Here we further  
309 show that unisexual cells have an advantage in competing for mating partners  
310 within the same colony. We tested whether hyphal growth during unisexual  
311 reproduction confers benefits in foraging for mating partners.

312 Both long-term and short-term foraging for mating partner experiments  
313 suggested that hyphal growth promoted foraging for mating. In a six-week mating  
314 confrontation experiment, hyphae of different *MAT* $\alpha$  unisexual reproduction  
315 backgrounds marked with NEO grew towards the same *MAT* $\alpha$  cells marked with  
316 HYG that were 4 mm apart (Figure 4A, B). When competing for either the same  
317 *MAT* $\alpha$  or *MAT* $\alpha$  cells (except LH *MAT* $\alpha$  cells), although not all pairwise  
318 comparisons by t-test were significant due to the lack of contact when strains of  
319 no or low hyphal growth were involved, a significant trend by one-way ANOVA  
320 was observed that isolates with more hyphal growth yielded more double drug  
321 resistant colonies than isolates with reduced hyphal growth (Figure 4C and Table  
322 S2). In a seven-day mini-colony mating experiment, colonies derived from single

323 cells produced hyphae that allowed contact with adjacent colonies of the  
324 opposite mating type (Figure S2A). Similar to the long-term mating confrontation  
325 experiment, a significant trend by one-way ANOVA was observed in which  
326 isolates with more hyphal growth had an advantage in forming double drug  
327 resistant colonies (Figure S2B and Table S3). Although pairwise comparisons by  
328 t-test showed significant differences between crosses involved NH and LH cells  
329 that were not observed in the confrontation experiment, this discrepancy is due to  
330 differences in the experimental setup where cells were inoculated at 0.4 cm apart  
331 during confrontation, whereas randomly plated on agar media during mini-colony  
332 mating experiment, where colony contact is enabled by both hyphal growth and  
333 chance. Overall, these results suggest that hyphal growth during unisexual  
334 reproduction can facilitate contact between mating partners in adjacent  
335 environments.

336

### 337 **Pheromone response pathway activation is correlated with hyphal growth** 338 **phenotype during bisexual reproduction**

339 Elevated pheromone response pathway activation and increased  
340 response to pheromones are critical to successful courtship during mating in *S.*  
341 *cerevisiae* and *C. albicans* [10, 11, 14]. *S. cerevisiae* utilizes the  $\alpha$ -factor  
342 protease Bar1 and  $\alpha$ -factor barrier Afb1 to discriminate mating partners with  
343 different pheromone levels and drive evolution towards higher pheromone  
344 production for efficient mating [44-47]. Pheromones also stimulate mating and  
345 the yeast-to-hyphal morphological transition during *C. neoformans* bisexual



346 reproduction [48]. To determine the role of the pheromone response pathway  
347 during *C. deneoformans* mating competition, expression levels were examined  
348 for the genes encoding the pheromones MF $\alpha$  and MFa, the pheromone receptors  
349 Ste3 $\alpha$  and Ste3a, the MAP kinase Cpk1, the transcription factors Mat2 and Znf2,  
350 and the plasma membrane fusion protein Prm1 [23, 40, 49].

351 Pheromone response pathway activation did not correlate with the hyphal  
352 growth phenotype in *MATa* or *MAT $\alpha$*  strains. In *MATa* strains, all of the  
353 pheromone response pathway genes were significantly upregulated in the MH  
354 strain XL280a compared to the LH and NH strains, but only MFa and *PRM1* were  
355 significantly upregulated in the LH strain XL187a compared to the NH strain  
356 JEC20a (Figure S3). In *MAT $\alpha$*  strains, all of the pheromone response pathway  
357 genes were significantly upregulated in the HH and MH strains compared to the  
358 LH strain JEC21 $\alpha$ , but the MH strain XL280 $\alpha$  had a significantly higher  
359 pheromone pathway activation compared to the HH strain XL190 $\alpha$  (Figure S3).  
360 The pheromone pathway was significantly upregulated in the EH strain JEC21 $\alpha$   
361 *gpa3 $\Delta$*  compared to the parental LH strain JEC21 $\alpha$  (Figure S3). These  
362 expression analyses suggest that pheromone response pathway activation *per*  
363 *se* is not sufficient to explain the ability to undergo unisexual reproduction and its  
364 association with competition for mating partners. It was previously shown that the  
365 cell fusion protein Prm1 is not required for unisexual reproduction [23], and  
366 certain environmental factors, such as copper and glucosamine, can induce  
367 hyphal growth independently of the pheromone response pathway [20, 21]. In a  
368 recent study on the quorum sensing peptide Qsp1, deletion of pheromone and

369 pheromone receptor genes had little impact on hyphal growth during unisexual  
370 reproduction [22], further indicating the polygenic nature of unisexual  
371 reproduction.

372         Despite the incongruent association of the pheromone response pathway  
373 and the ability to undergo unisexual reproduction, pheromone response pathway  
374 activation was positively correlated with the hyphal growth during bisexual  
375 reproduction. The  $\alpha$  pheromone gene *MF $\alpha$* , both **a** and  $\alpha$  pheromone receptor  
376 genes *STE3 $\alpha$*  and *STE3a*, and the plasma membrane fusion gene *PRM1*  
377 showed significant correlation with the hyphal growth phenotype (Figure 5A).  
378 Although *MFa* expression was lower in the cross between **a** MH and  $\alpha$  HH strains  
379 compared to **a** LH and  $\alpha$  MH strains, the significant upregulation of the *MF $\alpha$* ,  
380 *STE3 $\alpha$* , and *STE3a* may compensate for the overall pheromone response  
381 activation (Figure 5A). The gene expression patterns of two transcription factors  
382 Mat2 and Znf2 that regulate yeast-to-hyphal morphological transition and mating  
383 significantly correlated with the hyphal growth except for the cross between **a** MH  
384 and  $\alpha$  HH strains. Nonetheless, these two genes were expressed at higher levels  
385 compared to the cross between **a** LH and  $\alpha$  MH strains (Figure 5A). The  
386 expression of the MAP Kinase *CPK1* gene poorly correlated with hyphal growth  
387 (Figure 5A), which is likely due to post-translational control of the MAP kinase  
388 through phosphorylation, which can relieve a requirement for expression level  
389 upregulation during pathway activation. Overall, the pheromone response  
390 pathway activation is largely congruent with the hyphal growth phenotype  
391 suggesting that in the presence of cells of the opposite mating type, unisexual

392 cells are capable of upregulating the pheromone response pathway in both  
393 *MATa* and *MAT $\alpha$*  cells to compete for mating partners.

394 To validate that pheromone contributes to mating competitiveness, we  
395 tested whether synthetic  $\alpha$  pheromone promotes **a**- $\alpha$  cell fusion. Indeed,  
396 exogenous  $\alpha$  pheromone promoted cell fusion between **a** NH and  $\alpha$  LH cells in a  
397 dose dependent manner (Figure 5B). However, the enhancement of cell fusion  
398 frequency by pheromone is limited, compared to the 2788-fold increase of cell  
399 fusion frequency between **a** MH and  $\alpha$  HH cells over **a** NH and  $\alpha$  LH cells (Figure  
400 1D) that coincided with a 34.5-fold increase in  $\alpha$  pheromone expression (Figure  
401 5A). Interestingly, the mild increase in cell fusion by exogenous pheromone is not  
402 observed in the cross between **a** NH and  $\alpha$  EH cells (Figure S4A), which is likely  
403 due to the saturation of Ste3**a** by the 1184-fold higher  $\alpha$  pheromone expressed  
404 by  $\alpha$  EH cells (Figure S3). The less than two-fold increase in cell fusion provided  
405 by 5  $\mu$ M exogenous pheromone suggested that changes in  $\alpha$  pheromone alone  
406 are not able to tip the balance and drive the entire pheromone response pathway  
407 towards a stronger increase in mating efficiency. In support, exogenous supply of  
408 500 nM pheromone provided limited impact in cell fusion between cells of higher  
409 hyphal growth phenotypes (Figure S4A); and when hyphal growth was  
410 suppressed under nutrient rich conditions, exogenous pheromone had little to no  
411 impact on cell fusion (Figure S4B).

412 In response to the pheromone signal, *S. cerevisiae* undergoes filamentous  
413 growth to enhance the probabilities of cells finding a mating partner [50]. Here we  
414 observed that the **a** EH colonies responded to 5  $\mu$ M  $\alpha$  pheromone peptide and

415 produced abundant hyphae (Figure 5C), similar to previous report [51],  
416 suggesting that pheromone can promote hyphal growth and increase the contact  
417 opportunities between adjacent colonies within the same environment.

418

#### 419 ***gpa3Δ* mutation resulted in a fitness cost**

420 Upregulation of the pheromone response pathway enhances mating  
421 efficiency; however, this upregulation can result in a fitness cost in *S. cerevisiae*  
422 and *C. albicans* [14, 52]. In yeast, a short-term experimental evolution  
423 experiment showed that mutations abrogating expression of 23 genes involved in  
424 mating conferred a fitness benefit during yeast growth when functions of these  
425 genes are not required [52]. In *C. albicans*, cells undergo a white-opaque switch  
426 and upregulate the pheromone response pathway, which results in a fitness cost  
427 for the opaque cells [14]. Given that the pheromone response pathway is  
428 activated at a higher level in *C. deneoformans* strains with more hyphal growth  
429 during bisexual reproduction (Figure 5A), we investigated whether unisexual  
430 reproduction confers a fitness cost.

431 Growth curve analyses in YPD liquid medium were performed using an  
432 automated Tecan Sunrise absorbance reader to determine the fitness of different  
433 strains. The cultures were agitated with vigorous shaking for one minute bihourly  
434 before each OD<sub>600</sub> measurement. The minimum agitation allows for  
435 differentiation of growth curve kinetics among the strains tested, which would  
436 otherwise be indistinguishable when grown on solid YPD medium. Compared to

437 the low hyphal growth strains JEC21 $\alpha$  and JEC20 $\alpha$ , *gpa3* $\Delta$  mutants exhibited a  
438 growth defect in nutrient rich media, suggesting that deletion of *GPA3* resulted in  
439 a fitness cost (Figure S5). However, this fitness cost was not due to the yeast-to-  
440 hyphal morphological transition as hyphal growth was not present. Interestingly,  
441 deletion of the *GPA3* gene in the sister species *C. neoformans* did not induce  
442 hyphal growth or cause a growth defect compared to the non-hyphal strain  
443 KN99 $\alpha$  (Figure S5). It has been shown that the pheromone response pathway  
444 activation by *GPA3* gene deletion is lower in KN99 $\alpha$  than in JEC21 or JEC20,  
445 indicating that deletion of *GPA3* is not sufficient to rewire cellular responses to  
446 induce unisexual reproduction in *C. neoformans* [40].

447 We next performed fitness competition experiments. After 10 days of  
448 incubation of equally mixed cells on YPD and V8 agar medium, cells were  
449 collected and plated on selection media to determine colony forming units for  
450 each competition strain. Hyphal growth was observed on both YPD and V8  
451 media when  $\alpha$  MH cells were present, and both yeast cells and hyphae were  
452 collected to compare fitness (Figure S6). During competition between two LH  
453 strains, cells were recovered at about 1 to 1 ratio after 10-day incubation on both  
454 YPD and V8 media both in the absence or in the presence of  $\alpha$  cells (Figure 6A).  
455 In contrast, LH strain outcompeted EH strain when cells were incubated on V8  
456 medium or when  $\alpha$  cells were present (Figure 6B). On YPD medium in the  
457 absence of  $\alpha$  cells, the EH strain that displayed poor growth in liquid media  
458 (Figure S5) outcompeted the parental LH strain(Figure 6B), which is likely due to  
459 differential cellular responses under different growth conditions. However, this

460 competition advantage was reversed when **a** cells were present or when mixed  
461 cells were incubated on V8 medium (Figure 6B), suggesting that the presence  
462 cells of the opposite mating type or the mating inducing environment can elicit a  
463 fitness cost. This competition disadvantage for the EH strain on V8 medium was  
464 further exacerbated when **a** cells were present during competition (Figure 6B).  
465 These fitness competition assays demonstrate that *gpa3Δ* mutation enhances  
466 mating competition at a cost of growth fitness, and this fitness cost is likely due to  
467 the energy required in the expression of the pheromone response pathway  
468 genes. It has been reported that long-term passage on rich media in the lab often  
469 diminishes the hyphal growth phenotype of *MATa* strains, which further suggests  
470 that there is a fitness cost associated with the ability to undergo unisexual  
471 reproduction [53]. Interestingly, in *S. cerevisiae*, the [*SWI<sup>+</sup>*] prion state promotes  
472 outcrossing efficiency due to a defect in *HO* expression and mating type  
473 switching, which also leads to a fitness cost [54]. Taken together, fungal species  
474 have evolved different strategies in promoting mating in nature accompanied with  
475 a fitness tradeoff.

## 476 **Conclusion**

477           Sexual reproduction plays a pivotal role in shaping fungal population  
478 structure and diversity in nature. However, studies on how fungi secure a mating  
479 partner in nature for successful mating are limited. In this study, we aimed to  
480 characterize the ecological and evolutionary benefits of unisexual reproduction in  
481 *C. deneoformans*. Similar to the landmark study by Jackson and Hartwell  
482 showing that higher pheromone production promotes courtship in *S. cerevisiae*  
483 [11], we showed that strains with higher potential for unisexual reproduction are  
484 more competitive for mating partners of both the same and the opposite mating  
485 types when cells of the opposite mating type are present, and the pheromone  
486 response pathway activation is positively correlated with the hyphal growth  
487 phenotype (Figure 7). More interestingly, in addition to pheromone sensing,  
488 unisexual cells employ hyphal growth to increase contact opportunities between  
489 colonies at relatively long distances. However, this mating competition advantage  
490 results in a fitness cost for unisexual cells during mitotic growth under mating-  
491 inducing conditions.

492           The strains involved in this study were all derived from natural and clinical  
493 isolates under laboratory conditions, suggesting that the ability to undergo  
494 unisexual reproduction is likely to span a broad range in the environment. The  
495 majority of natural and clinical isolates of the *Cryptococcus* species complex are  
496 found to be of the  $\alpha$  mating type, which accounts for 99% of *C. neoformans*  
497 isolates [25-27]. In a survey of *C. deneoformans* environmental distribution  
498 around the Mediterranean basin, 27% of isolates are *MATa* isolates, which were

499 all recovered in Greece, suggesting certain environmental niches harbor *MATa*  
500 cells [27]. Genomic and genetic evidence also suggest that recombination is  
501 prevalent among these environmental isolates, and some isolates are isolated  
502 from a single *Eucalyptus* hollow, which underscores that mating occurs in nature  
503 [30-32]. Although sexual structures of *Cryptococcus* species have yet to be  
504 documented in nature, plant material-based media such as V8, on which we  
505 conducted the mating competition assays, can readily induce sexual reproduction  
506 under laboratory conditions, suggesting that the mating competition we observed  
507 could happen in its environmental niche. We hypothesize that in the presence of  
508 *MATa* cells sparsely distributed in the environment, undirected hyphal growth first  
509 enables unisexual *MAT $\alpha$*  cells to forage for mating partners over a much larger  
510 surface area than is available to cells within a much more compact budding yeast  
511 colony. Next, as *MAT $\alpha$*  hyphae come into the proximity of rare *MATa* cells,  
512 pheromone response pathway activation in both *MAT $\alpha$*  and *MATa* cells can  
513 further enhance mating competition. This mating competition advantage could  
514 promote outcrossing and provide an evolutionary advantage by facilitating  
515 genome reshuffling via meiotic recombination in a pathogenic yeast species.



## 516 **Materials and methods**

### 517 **Strains, media, and growth conditions**

518 Strains used in this study are listed in Table S4. Strains with different  
519 hyphal growth phenotypes, XL190 $\alpha$ , XL280 $\alpha$ , JEC21 $\alpha$ , XL280a, XL187a, and  
520 JEC20a, were selected to represent high, intermediate, and low hyphal strains  
521 [16, 35, 38, 39]. Yeast cells were grown at 30°C on Yeast extract Peptone  
522 Dextrose (YPD) medium. Strains harboring dominant selectable markers were  
523 grown on YPD medium supplemented with 100  $\mu$ g/mL nourseothricin (NAT), 200  
524  $\mu$ g/mL G418 (NEO), or 200  $\mu$ g/mL hygromycin (HYG) for selection. Mating  
525 assays were performed on 5% V8 juice agar medium (pH = 7.0) or Murashige  
526 and Skoog (MS) medium minus sucrose (Sigma-Aldrich) in the dark at room  
527 temperature for the designated time period.

528

### 529 **Drug-resistant marker strain generation and gene deletion**

530 NAT (pAI3) or G418/NEO (pJAF1) resistant expression constructs were  
531 introduced into XL190 $\alpha$ , XL280 $\alpha$ , and JEC21 $\alpha$ , and a HYG (pJAF15) resistant  
532 expression construct was introduced into XL280 $\alpha$ , XL280a, XL187a, and JEC20a  
533 ectopically via biolistic transformation as previously described [55-57].

534 To generate deletion mutants for *GPA3*, a deletion construct consisting of  
535 the 5' upstream and 3' downstream regions of *GPA3* gene flanking the *NEO*  
536 cassette was generated by overlap PCR as previously described [58]. The *GPA3*  
537 deletion construct was introduced into the strain JEC21 $\alpha$  via biolistic

538 transformation. Transformants were selected on YPD medium supplemented  
539 with G418, and gene replacement by homologous recombination was confirmed  
540 by PCR. Primers used to generate these deletion constructs are listed in Table  
541 S5.

542

### 543 **Microscopy**

544 Cells were grown on V8 agar medium for seven days or three weeks in  
545 the dark at room temperature to allow hyphal formation. Hyphal growth on the  
546 edge of mating patches was imaged using a Nikon Eclipse E400 microscope  
547 equipped with a Nikon DXM1200F camera.

548

### 549 **Competitive mating assays**

550 For each competitive mating assay, cells were grown overnight in YPD  
551 liquid medium at 30°C and adjusted to  $OD_{600}=0.5$  in sterile H<sub>2</sub>O, and then equal  
552 volumes of cells marked with different dominant drug resistant markers were  
553 mixed and spot inoculated (50  $\mu$ l) on V8 agar medium. The mating plates were  
554 incubated for four days in the dark at room temperature. The cells were  
555 harvested and plated in serial dilution on YPD medium and YPD medium  
556 supplemented with different two drug combinations (NAT and NEO, NAT and  
557 HYG, or NEO and HYG). The cells were incubated for three to five days at room  
558 temperature and colony forming units were counted. Cell fusion frequencies were  
559 determined as double drug resistant CFU/total CFU. The complete competitive

560 mating experimental design is listed in Table S6. Each mating competition was  
561 performed in biological triplicate.

562

### 563 **Foraging for mating assays**

564 To investigate whether hyphal growth enables cells foraging for mating  
565 partners, we performed long-term confrontation and short-term mini-colony  
566 mating experiments. For the confrontation mating experiment, HYG resistant  
567 XL280a, XL187a, and JEC20a were streaked and grown on V8 medium to form a  
568 line of cells, and then NEO resistant XL190α, XL280α, and JEC21α, and JEC21α  
569 *gpa3Δ::NEO* were spot inoculated 4 mm apart in parallel along the *MATa* cells.  
570 Unisexual hyphae grew towards cells of the opposite mating type for six weeks.  
571 Then the cells were collected and plated on YPD medium supplemented with  
572 HYG and NEO. After incubation at room temperature for three to five days, total  
573 double drug resistant colony forming units were counted to determine whether  
574 hyphal growth conferred an advantage in foraging for mating partners. Each  
575 confrontation mating experiment was performed in biological quintuplicate. For  
576 the mini-colony mating experiment, the aforementioned HYG resistant *MATa*  
577 strains and NEO resistant *MATα* strains were grown overnight in YPD liquid  
578 medium and adjusted to OD<sub>600</sub>=0.008. For each mating pair, 100 μl of *MATa*  
579 cells and 100 μl of *MATα* cells were mixed and plated on V8 agar medium to  
580 form evenly spaced mini colonies. Unisexual hyphae facilitate contact between  
581 adjacent colonies after growing for seven days. Then the cells were collected and  
582 plated on YPD medium and YPD medium supplemented with HYG and NEO.

583 The cells were incubated for three to five days at room temperature and colony  
584 forming units were counted. Cell fusion frequencies were determined as double  
585 drug resistant CFU/total CFU. Each mating was performed in biological triplicate.

586

### 587 **RNA extraction and qRT-PCR**

588 To examine pheromone response pathway activation, qRT PCR  
589 experiments were performed on RNA extracted from cells incubated on V8 agar  
590 medium for 36 hours as previously described [23]. In brief, XL190 $\alpha$ , XL280 $\alpha$ ,  
591 JEC21 $\alpha$ , JEC21 $\alpha$  *gpa3 $\Delta$ ::NEO*, XL280 $\alpha$ , XL187 $\alpha$ , and JEC20 $\alpha$  were grown  
592 overnight in YPD liquid medium and adjusted to OD<sub>600</sub>=2 in sterile H<sub>2</sub>O. Then  
593 cells of individual strains and an equal-volume mixtures of cells for crosses  
594 between XL190 $\alpha$  and XL280 $\alpha$ , XL280 $\alpha$  and XL187 $\alpha$ , JEC21 $\alpha$  and JEC20 $\alpha$ , and  
595 JEC21 $\alpha$  *gpa3 $\Delta$ ::NEO* and JEC20 $\alpha$  were spotted (250  $\mu$ l) on V8 medium and  
596 incubated for 36 hours. Cell patches of individual strains and of mixture of  $\alpha$  and  
597  $\alpha$  strains were scraped off the medium and transferred into Eppendorf tubes then  
598 flash frozen in liquid nitrogen. RNA was extracted using TRIzol reagent (Thermo)  
599 following the manufacturer's instructions. RNA was treated with Turbo DNase  
600 (Ambion), and single-stranded cDNA was synthesized by AffinityScript RT-  
601 RNase (Stratagene). cDNA synthesized without the RT/RNase block enzyme  
602 mixture was used to control for genomic DNA contamination. The relative  
603 expression levels of targeted genes were measured by qRT PCR using Brilliant  
604 III ultra-fast SYBR green QPCR mix (Stratagene) in an Applied Biosystems 7500  
605 Real-Time PCR system. A "no template control" was used to analyze the

606 resulting melting curves to exclude primer artifacts for each target gene. Gene  
607 expression levels were normalized to the endogenous reference gene *GPD1*  
608 using the comparative  $\Delta\Delta C_t$  method. Primers used for qRT-PCR are listed in  
609 Table S5. For each target gene and each sample, technical triplicate and  
610 biological triplicate were performed.

611

### 612 **Mating assays with exogenous $\alpha$ pheromone peptide**

613 To address whether pheromone promotes mating competition and hyphal  
614 growth, carboxyl farnesylated and methylated  $\alpha$  pheromone peptide  
615 (QEAHPGGMTLC) (synthesized at GenScript, USA) was tested for its impact on  
616 mating and hyphal growth.  $\alpha$  pheromone peptide was dissolved in methanol at  
617 the concentration of 50  $\mu$ M and 10-fold serial dilutions in methanol were prepared  
618 as stock solutions. For the mating assay, *HYG* marked *MATa* and *NEO* marked  
619 *MAT $\alpha$*  cells were prepared and mixed as mentioned above for the mating  
620 competition assays.  $\alpha$  pheromone peptide was added to mixed **a** NH (CF926)  
621 and  $\alpha$  LH (CF759) cells at the concentrations of 0, 500 pM, 5 nM, 50 nM, 500 nM,  
622 and 5  $\mu$ M, and the mixed cells were spot-inoculated on the V8 media and  
623 incubated in the dark at room temperature for four days. Cells were then  
624 harvested and plated on both YPD and YPD media supplemented with NEO and  
625 HYG to determine cell fusion frequency. Same mating assays were carried out  
626 for crosses between **a** MH (CF978) and  $\alpha$  HH (CF914), **a** LH (CF931) and  $\alpha$  MH  
627 (CF752), **a** NH (CF926) and  $\alpha$  LH (CF759), and **a** NH (CF926) and  $\alpha$  EH

628 (CF1314) both in the absence and in the presence of 500 nM  $\alpha$  pheromone  
629 peptide on both YPD and V8 media.

630 To test the impact of  $\alpha$  pheromone peptide on hyphal growth, 5  $\mu$ M  $\alpha$   
631 pheromone peptide and methanol were dropped onto MS media and allowed to  
632 dry. **a** EH (YPH86) cells were grown overnight and washed with H<sub>2</sub>O twice, and  
633 then inoculated onto the MS plate with dried  $\alpha$  pheromone peptide and methanol  
634 droplets at a different spot. Cells were then microscopically manipulated and  
635 transferred to the  $\alpha$  pheromone peptide and methanol spots. Colony hyphal  
636 growth was monitored daily and imaged after incubation in the dark at room  
637 temperature for 72 hours.

638

### 639 **Fitness competition and growth curve assays**

640 Competition experiments were performed to compare fitness between two  
641 low hyphal strains and between low and enhanced hyphal strains both in the  
642 absence and in the presence of the **a** MH cells. Overnight cultures of JEC21 $\alpha$   
643 *NAT*, JEC21 $\alpha$  *NEO*, JEC21 $\alpha$  *gpa3 $\Delta$ ::NEO*, and XL280**a** were washed with H<sub>2</sub>O  
644 twice and cell densities were determined with a hemocytometer. For each  
645 competition experiment, 10  $\mu$ l of H<sub>2</sub>O containing 100,000 cells of each strain was  
646 spotted on either YPD or V8 agar medium and incubated in the dark at room  
647 temperature for 10 days. Cells were collected and plated on YPD medium  
648 supplemented with NAT or G418 to determine colony forming units. Cell mixtures  
649 were plated before incubation to control for equal mixing. Each competition was

650 performed in triplicate. Fitness was determined by calculating the percentile of  
651 the recovered CFU of each strain out of the total recovered dominant drug  
652 resistant CFU.

653 To determine the growth fitness of different unisexual strains, KN99a,  
654 KN99a *gpa3Δ::NEO*, JEC20a, JEC20a *gpa3Δ::NEO*, JEC21α, and JEC21α  
655 *gpa3Δ::NEO* were grown overnight in YPD liquid medium and washed twice in  
656 H<sub>2</sub>O. 10,000 cells for each strain were resuspended in 200 μl YPD liquid medium  
657 and incubated in a 96-well plate (Corning) at 30°C with vigorous shaking for 1  
658 min bihourly. OD<sub>600</sub> readings were measured bi-hourly after shaking using an  
659 automated Tecan Sunrise absorbance reader. Each sample was tested in  
660 quintuplicate.

661

## 662 **Statistical analysis**

663 All statistical analyses were performed using the Graphpad Prism 7  
664 program. Welch's t-test was performed for each pairwise comparison, and one-  
665 way ANOVA was performed for each group analysis with a *p* value lower than  
666 0.05 considered statistically significant (\* indicates 0.01 < *p* ≤ 0.05, \*\* indicates  
667 0.001 < *p* ≤ 0.01, \*\*\* indicates 0.0001 < *p* ≤ 0.001, and \*\*\*\* indicates *p* ≤ 0.0001).

668 **Acknowledgements**

669           We thank Shelby Priest, Daniel Lew, Sheng Sun, and Zanetta Chang for  
670 critical reading of the manuscript. This work was supported by NIH/NIAID R37  
671 grant AI39115-21 and R01 grant AI50113-15 to J.H.

672



673 **Author Contributions**

674           Conceptualization, C.F., T.P.T., and J.H.; Formal analysis, C.F., T.P.T.,  
675 and J.H.; Funding acquisition, J.H.; Investigation, C.F. and T.P.T.; Methodology,  
676 C.F., T.P.T., and J.H.; Resources, C.F. and J.H.; Supervision, J.H.; Writing –  
677 original draft, C.F.; Writing – review & editing, C.F., T.P.T., and J.H.

678

679 **Declaration of Interests**

680           The authors declare no competing interests.

681

## 682 References

683

- 684 1. Muller, M.N., and Wrangham, R.W. (2009). Sexual coercion in primates and humans: an  
685 evolutionary perspective on male aggression against females, (Cambridge, Mass.:  
686 Harvard University Press).
- 687 2. Clark, C.J., and Mistick, E.A. (2018). Strategic acoustic control of a hummingbird  
688 courtship dive. *Curr Biol* 28, 1257-1264.
- 689 3. Clemens, J., Coen, P., Roemschied, F.A., Pereira, T.D., Mazumder, D., Aldarondo, D.E.,  
690 Pacheco, D.A., and Murthy, M. (2018). Discovery of a new song mode in *Drosophila*  
691 reveals hidden structure in the sensory and neural drivers of behavior. *Curr Biol* 28,  
692 2400-2412 e2406.
- 693 4. Lardner, B., and bin Lakim, M. (2002). Animal communication: tree-hole frogs exploit  
694 resonance effects. *Nature* 420, 475.
- 695 5. Berglund, A., and Rosenqvist, G. (2001). Male pipefish prefer ornamented females. *Anim*  
696 *Behav* 61, 345-350.
- 697 6. Ydenberg, C.A., and Rose, M.D. (2008). Yeast mating: a model system for studying cell  
698 and nuclear fusion. *Methods Mol. Biol.* 475, 3-20.
- 699 7. Dyer, P.S., Ingram, D.S., and Johnstone, K. (1992). The control of sexual morphogenesis  
700 in the ascomycotina. *Biol Rev* 67, 421-458.
- 701 8. Miller, M.G., and Johnson, A.D. (2002). White-opaque switching in *Candida albicans* is  
702 controlled by mating-type locus homeodomain proteins and allows efficient mating. *Cell*  
703 110, 293-302.
- 704 9. Jones, S.K., Jr., and Bennett, R.J. (2011). Fungal mating pheromones: choreographing the  
705 dating game. *Fungal Genet. Biol.* 48, 668-676.
- 706 10. Jackson, C.L., and Hartwell, L.H. (1990). Courtship in *Saccharomyces cerevisiae*: an early  
707 cell-cell interaction during mating. *Mol. Cell Biol.* 10, 2202-2213.
- 708 11. Jackson, C.L., and Hartwell, L.H. (1990). Courtship in *S. cerevisiae*: both cell types choose  
709 mating partners by responding to the strongest pheromone signal. *Cell* 63, 1039-1051.
- 710 12. Dudin, O., Merlini, L., and Martin, S.G. (2016). Spatial focalization of pheromone/MAPK  
711 signaling triggers commitment to cell-cell fusion. *Genes Dev.* 30, 2226-2239.
- 712 13. Merlini, L., Khalili, B., Bendezu, F.O., Hurwitz, D., Vincenzetti, V., Vavylonis, D., and  
713 Martin, S.G. (2016). Local pheromone release from dynamic polarity sites underlies cell-  
714 cell pairing during yeast mating. *Curr Biol.* 26, 1117-1125.
- 715 14. Scaduto, C.M., Kabrawala, S., Thomson, G.J., Scheving, W., Ly, A., Anderson, M.Z.,  
716 Whiteway, M., and Bennett, R.J. (2017). Epigenetic control of pheromone MAPK  
717 signaling determines sexual fecundity in *Candida albicans*. *Proc. Natl. Acad. Sci. USA*  
718 114, 13780-13785.
- 719 15. Kwon-Chung, K.J. (1976). Morphogenesis of *Filobasidiella neoformans*, the sexual state  
720 of *Cryptococcus neoformans*. *Mycologia* 68, 821-833.
- 721 16. Lin, X., Hull, C.M., and Heitman, J. (2005). Sexual reproduction between partners of the  
722 same mating type in *Cryptococcus neoformans*. *Nature* 434, 1017-1021.
- 723 17. Wickes, B.L., Mayorga, M.E., Edman, U., and Edman, J.C. (1996). Dimorphism and  
724 haploid fruiting in *Cryptococcus neoformans*: association with the  $\alpha$ -mating type. *Proc.*  
725 *Natl. Acad. Sci. USA* 93, 7327-7331.

- 726 18. Fu, C., Sun, S., Billmyre, R.B., Roach, K.C., and Heitman, J. (2015). Unisexual versus  
727 bisexual mating in *Cryptococcus neoformans*: Consequences and biological impacts.  
728 Fungal Genet. Biol. 78, 65-75.
- 729 19. Wang, L., and Lin, X. (2011). Mechanisms of unisexual mating in *Cryptococcus*  
730 *neoformans*. Fungal Genet. Biol. 48, 651-660.
- 731 20. Gyawali, R., Zhao, Y., Lin, J., Fan, Y., Xu, X., Upadhyay, S., and Lin, X. (2017). Pheromone  
732 independent unisexual development in *Cryptococcus neoformans*. PLoS Genet. 13,  
733 e1006772.
- 734 21. Xu, X., Lin, J., Zhao, Y., Kirkman, E., So, Y.S., Bahn, Y.S., and Lin, X. (2017). Glucosamine  
735 stimulates pheromone-independent dimorphic transition in *Cryptococcus neoformans*  
736 by promoting Crz1 nuclear translocation. PLoS Genet 13, e1006982.
- 737 22. Tian, X., He, G.-J., Hu, P., Chen, L., Tao, C., Cui, Y.-L., Shen, L., Ke, W., Xu, H., Zhao, Y., et  
738 al. (2018). *Cryptococcus neoformans* sexual reproduction is controlled by a quorum  
739 sensing peptide. Nat. Microbiol. 3, 698-707.
- 740 23. Fu, C., and Heitman, J. (2017). *PRM1* and *KAR5* function in cell-cell fusion and karyogamy  
741 to drive distinct bisexual and unisexual cycles in the *Cryptococcus* pathogenic species  
742 complex. PLoS Genet. 13, e1007113.
- 743 24. Fu, C., Donadio, N., Cardenas, M.E., and Heitman, J. (2018). Dissecting the roles of the  
744 calcineurin pathway in unisexual reproduction, stress responses, and virulence in  
745 *Cryptococcus deneoformans*. Genetics 208, 639-653.
- 746 25. Kwon-Chung, K.J., and Bennett, J.E. (1978). Distribution of  $\alpha$  and a mating types of  
747 *Cryptococcus neoformans* among natural and clinical isolates. Am. J. Epidemiol 108, 337-  
748 340.
- 749 26. Litvintseva, A.P., Kestenbaum, L., Vilgalys, R., and Mitchell, T.G. (2005). Comparative  
750 analysis of environmental and clinical populations of *Cryptococcus neoformans*. J. Clin.  
751 Microbiol. 43, 556-564.
- 752 27. Cogliati, M., D'Amicis, R., Zani, A., Montagna, M.T., Caggiano, G., De Giglio, O., Balbino,  
753 S., De Donno, A., Serio, F., Susever, S., et al. (2016). Environmental distribution of  
754 *Cryptococcus neoformans* and *C. gattii* around the Mediterranean basin. FEMS Yeast Res  
755 16.
- 756 28. Roach, K.C., and Heitman, J. (2014). Unisexual reproduction reverses Muller's ratchet.  
757 Genetics 198, 1059-1069.
- 758 29. Ni, M., Feretzaki, M., Li, W., Floyd-Averette, A., Mieczkowski, P., Dietrich, F.S., and  
759 Heitman, J. (2013). Unisexual and heterosexual meiotic reproduction generate  
760 aneuploidy and phenotypic diversity *de novo* in the yeast *Cryptococcus neoformans*.  
761 PLoS Biol. 11, e1001653.
- 762 30. Saul, N., Krockenberger, M., and Carter, D. (2008). Evidence of recombination in mixed-  
763 mating-type and alpha-only populations of *Cryptococcus gattii* sourced from single  
764 eucalyptus tree hollows. Eukaryot. Cell 7, 727-734.
- 765 31. Litvintseva, A.P., Marra, R.E., Nielsen, K., Heitman, J., Vilgalys, R., and Mitchell, T.G.  
766 (2003). Evidence of sexual recombination among *Cryptococcus neoformans* serotype A  
767 isolates in Sub-Saharan Africa. Eukaryot. Cell 2, 1162-1168.
- 768 32. Campbell, L.T., Currie, B.J., Krockenberger, M., Malik, R., Meyer, W., Heitman, J., and  
769 Carter, D. (2005). Clonality and recombination in genetically differentiated subgroups of  
770 *Cryptococcus gattii*. Eukaryot. Cell 4, 1403-1409.
- 771 33. Cullen, P.J., and Sprague, G.F., Jr. (2012). The regulation of filamentous growth in yeast.  
772 Genetics 190, 23-49.

- 773 34. Phadke, S.S., Feretzaki, M., and Heitman, J. (2013). Unisexual reproduction enhances  
774 fungal competitiveness by promoting habitat exploration via hyphal growth and  
775 sporulation. *Eukaryot. Cell* 12, 1155-1159.
- 776 35. Lin, X., Huang, J.C., Mitchell, T.G., and Heitman, J. (2006). Virulence attributes and  
777 hyphal growth of *C. neoformans* are quantitative traits and the *MAT $\alpha$*  allele enhances  
778 filamentation. *PLoS Genet.* 2, e187.
- 779 36. Heitman, J., Allen, B., Alspaugh, J.A., and Kwon-Chung, K.J. (1999). On the origins of  
780 congenic MAT $\alpha$  and MAT $\alpha$  strains of the pathogenic yeast *Cryptococcus*  
781 *neoformans*. *Fungal Genet Biol* 28, 1-5.
- 782 37. Kwon-Chung, K.J. (1975). A new genus, *Filobasidiella*, the perfect state of *Cryptococcus*  
783 *neoformans*. *Mycologia* 67, 1197-1200.
- 784 38. Kwon-Chung, K.J., Edman, J.C., and Wickes, B.L. (1992). Genetic association of mating  
785 types and virulence in *Cryptococcus neoformans*. *Infect. Immun.* 60, 602-605.
- 786 39. Zhai, B., Zhu, P., Foyle, D., Upadhyay, S., Idnurm, A., and Lin, X. (2013). Congenic strains  
787 of the filamentous form of *Cryptococcus neoformans* for studies of fungal  
788 morphogenesis and virulence. *Infect. Immun.* 81, 2626-2637.
- 789 40. Hsueh, Y.P., Xue, C., and Heitman, J. (2007). G protein signaling governing cell fate  
790 decisions involves opposing G $\alpha$  subunits in *Cryptococcus neoformans*. *Mol. Biol. Cell* 18,  
791 3237-3249.
- 792 41. Gong, J., Grodsky, J.D., Zhang, Z., and Wang, P. (2014). A Ric8/synembryn homolog  
793 promotes Gpa1 and Gpa2 activation to respectively regulate cyclic AMP and pheromone  
794 signaling in *Cryptococcus neoformans*. *Eukaryot Cell* 13, 1290-1299.
- 795 42. Feretzaki, M., and Heitman, J. (2013). Genetic circuits that govern bisexual and unisexual  
796 reproduction in *Cryptococcus neoformans*. *PLoS Genet.* 9, e1003688.
- 797 43. Nielsen, K., Cox, G.M., Wang, P., Toffaletti, D.L., Perfect, J.R., and Heitman, J. (2003).  
798 Sexual cycle of *Cryptococcus neoformans* var. *grubii* and virulence of congenic  $\alpha$  and  $\alpha$   
799 isolates. *Infect. Immun.* 71, 4831-4841.
- 800 44. Huberman, L.B., and Murray, A.W. (2013). Genetically engineered transvestites reveal  
801 novel mating genes in budding yeast. *Genetics* 195, 1277-1290.
- 802 45. Sprague, G.F., Jr., and Herskowitz, I. (1981). Control of yeast cell type by the mating type  
803 locus. I. Identification and control of expression of the  $\alpha$ -specific gene *BAR1*. *J. Mol. Biol.*  
804 153, 305-321.
- 805 46. Banderas, A., Koltai, M., Anders, A., and Sourjik, V. (2016). Sensory input attenuation  
806 allows predictive sexual response in yeast. *Nat Commun* 7, 12590.
- 807 47. Jin, M., Errede, B., Behar, M., Mather, W., Nayak, S., Hasty, J., Dohlman, H.G., and  
808 Elston, T.C. (2011). Yeast dynamically modify their environment to achieve better  
809 mating efficiency. *Sci Signal* 4.
- 810 48. Shen, W.C., Davidson, R.C., Cox, G.M., and Heitman, J. (2002). Pheromones stimulate  
811 mating and differentiation via paracrine and autocrine signaling in *Cryptococcus*  
812 *neoformans*. *Eukaryot. Cell* 1, 366-377.
- 813 49. Lin, X., Jackson, J.C., Feretzaki, M., Xue, C., and Heitman, J. (2010). Transcription factors  
814 Mat2 and Znf2 operate cellular circuits orchestrating opposite- and same-sex mating in  
815 *Cryptococcus neoformans*. *PLoS Genet.* 6, e1000953.
- 816 50. Erdman, S., and Snyder, M. (2001). A filamentous growth response mediated by the  
817 yeast mating pathway. *Genetics* 159, 919-928.
- 818 51. Davidson, R.C., Moore, T.D., Odom, A.R., and Heitman, J. (2000). Characterization of the  
819 MF $\alpha$  pheromone of the human fungal pathogen *cryptococcus neoformans*. *Mol*  
820 *Microbiol* 38, 1017-1026.

- 821 52. Lang, G.I., Murray, A.W., and Botstein, D. (2009). The cost of gene expression underlies a  
822 fitness trade-off in yeast. *Proc. Natl. Acad. Sci. USA* *106*, 5755-5760.
- 823 53. Tscharke, R.L., Lazera, M., Chang, Y.C., Wickes, B.L., and Kwon-Chung, K.J. (2003).  
824 Haploid fruiting in *Cryptococcus neoformans* is not mating type  $\alpha$ -specific. *Fungal Genet.*  
825 *Biol.* *39*, 230-237.
- 826 54. Newby, G.A., and Lindquist, S. (2017). Pioneer cells established by the [SWI<sup>+</sup>] prion can  
827 promote dispersal and out-crossing in yeast. *PLoS Biol* *15*, e2003476.
- 828 55. Fraser, J.A., Subaran, R.L., Nichols, C.B., and Heitman, J. (2003). Recapitulation of the  
829 sexual cycle of the primary fungal pathogen *Cryptococcus neoformans* var. *gattii*:  
830 implications for an outbreak on Vancouver Island, Canada. *Eukaryot. Cell* *2*, 1036-1045.
- 831 56. Idnurm, A., Reedy, J.L., Nussbaum, J.C., and Heitman, J. (2004). *Cryptococcus*  
832 *neoformans* virulence gene discovery through insertional mutagenesis. *Eukaryot. Cell* *3*,  
833 420-429.
- 834 57. Davidson, R.C., Cruz, M.C., Sia, R.A., Allen, B., Alspaugh, J.A., and Heitman, J. (2000).  
835 Gene disruption by biolistic transformation in serotype D strains of *Cryptococcus*  
836 *neoformans*. *Fungal Genet. Biol.* *29*, 38-48.
- 837 58. Davidson, R.C., Blankenship, J.R., Kraus, P.R., de Jesus Berrios, M., Hull, C.M., D'Souza,  
838 C., Wang, P., and Heitman, J. (2002). A PCR-based strategy to generate integrative  
839 targeting alleles with large regions of homology. *Microbiology* *148*, 2607-2615.

840

841

842 **Figure legends**

843

844 **Figure 1. Unisexual reproduction potential does not enhance competition**  
845 **for mating partners of the same mating type.**

846 (A) Hyphal growth on V8 agar medium for three weeks of high (HH), intermediate  
847 (MH), low (LH), and no (NH) hyphal *MAT $\alpha$*  and *MAT $a$*  strains. The scale bar  
848 represents 500  $\mu$ m. (B) Experimental design of the unisexual and bisexual  
849 mating competition. (C-E) Average cell fusion frequencies. Error bars indicate  
850 standard deviation. (C) Unisexual  $\alpha$ - $\alpha$  cell fusion frequencies of high,  
851 intermediate, and low hyphal strains. (D) Bisexual  $a$ - $\alpha$  cell fusion frequencies of  
852 intermediate-high, low- intermediate, and no-low hyphal strains. (\* indicates  
853  $0.01 < p \leq 0.05$  and \*\* indicates  $0.001 < p \leq 0.01$  for each pairwise comparison) (E)  
854 Cell fusion frequencies among three *MAT $\alpha$*  strains of different hyphal growth  
855 phenotypes during unisexual mating competition are shown.

856

857 **Figure 2. Unisexual reproduction potential enhances competition for**  
858 **mating partners of both mating types.**

859 (A)  $a$ - $\alpha$  Cell fusion frequencies for mating competitions between two *MAT $\alpha$*   
860 strains over a *MAT $a$*  strain. (B) Unisexual  $\alpha$ - $\alpha$  cell fusion frequencies in the  
861 presence of *MAT $a$*  strains of different hyphal growth phenotypes. \*\* indicates  
862  $0.001 < p \leq 0.01$ , \*\*\* indicates  $0.0001 < p \leq 0.001$ , and \*\*\*\* indicates  $p \leq 0.0001$  for  
863 each group analysis by one-way ANOVA.

864

865 **Figure 3. *gpa3Δ* mutation-enhances hyphal growth and competition for**  
866 **mating partners of both the same and opposite mating types.**

867 (A) Hyphal growth on V8 agar medium for one week for enhanced hyphal strain  
868 (JEC21α *gpa3Δ::NEO*) during unisexual (top) and unilateral bisexual (bottom)  
869 development compared to low hyphal strain (JEC21α). The scale bar represents  
870 500 μm. (B-C) Unisexual α-α (B) and bisexual a-α (C) cell fusion frequencies  
871 between two low hyphal strains and between no and enhanced hyphal strains.  
872 (D-E) Cell fusion frequencies during unisexual mating competition among two low  
873 and one intermediate hyphal *MATα* strains (D), and one low, one enhanced, and  
874 one intermediate hyphal *MATα* strains (E). (F-G) Cell fusion frequencies during  
875 bisexual mating competition for a no hyphal *MATa* strain between two low hyphal  
876 *MATα* strains (F), and between one low and one enhanced hyphal *MATα* strain  
877 (G). (H) Unisexual α-α cell fusion frequencies between two low hyphal *MATα*  
878 strains, and between one low and one enhanced hyphal *MATα* strain in the  
879 presence of a no hyphal *MATa* strain. \* indicates  $0.01 < p \leq 0.05$  for the pairwise  
880 comparison.

881

882 **Figure 4. Hyphal growth during unisexual reproduction promotes foraging**  
883 **for mating partners in a mating confrontation assay.**

884 (A) Schematic diagram for the confrontation mating experiment setup. *MATa*  
885 cells were grown to form a line of cells, and *MATα* cells were spot-inoculated 4



886 mm apart in parallel along the *MATa* cells. (B) LH, MH, HH, and EH *MATa*  
887 hyphal cells were grown towards NH, LH, and MH *MATa* cells for six weeks. The  
888 scale bar represents 500  $\mu$ m. (C) Total G418/HYG resistant colonies produced  
889 by each confrontation mating pair. LH, MH, HH, and EH *MATa* hyphal cells  
890 yielded an average of 0.4, 10, 44, and 1.8 double drug resistant colonies with NH  
891 *MATa* cells, 0.4, 26, 81, and 0.4 double drug resistant colonies with LH *MATa*  
892 cells, 17, 239, 613, and 422 double drug resistant colonies with MH *MATa* cells,  
893 respectively. \* indicates  $0.01 < p \leq 0.05$ , \*\* indicates  $0.001 < p \leq 0.01$ , and \*\*\*\*  
894 indicates  $p \leq 0.0001$  for each group analysis by one-way ANOVA.

895

896 **Figure 5. Pheromone response pathway activation associated with**  
897 **unisexual reproduction.**

898 (A) Pheromone response pathway activation during bisexual reproduction is  
899 correlated with the hyphal growth phenotype. Gene expression patterns for *MFa*,  
900 *MFa*, *STE3a*, *STE3a*, *CPK1*, *MAT2*, *ZNF2*, and *PRM1* were examined by qRT  
901 PCR (NS indicates  $p \leq 0.01$ , \* indicates  $0.01 < p \leq 0.05$ , \*\* indicates  $0.001 < p \leq 0.01$ ,  
902 \*\*\* indicates  $0.0001 < p \leq 0.001$ , and \*\*\*\* indicates  $p \leq 0.0001$  for each pairwise  
903 comparison.). Crosses between MH *MATa* (XL280a) and HH *MATa* (XL190a)  
904 strains, LH *MATa* (XL187a) and MH*MATa* (XL280a) strains, NH *MATa* (JEC20a)  
905 and LH *MATa* (JEC21a) strains, and NH *MATa* (JEC20a) and EH *MATa*  
906 (JEC21a *gpa3Δ::NEO*) strains were grown on V8 agar medium for 36 hours. The  
907 expression levels of genes from the cross between JEC20a and JEC21a were  
908 set to 1, and the remaining values were normalized to this. The error bars

909 represent the standard deviation of the mean for three biological replicates. (B)  
910 Exogenous pheromone enhances cell fusion frequency between NH *MATa* and  
911 LH *MATa* strains in a dose dependent manner.  $p=0.0125$  by one-way ANOVA.  
912 (C) EH *MATa* (JEC20a *gpa3Δ::ADE2 ade2*) colonies produced more hyphae in  
913 response to exogenous pheromone after three-day incubation on MS medium.

914 **Figure 6. *gpa3Δ* mutation confers a fitness cost under mating inducing**  
915 **conditions.**

916 Equal numbers of cells of (A) two low hyphal strains (JEC21α *NAT* and JEC21α  
917 *NEO*) and of (B) a low hyphal strain (JEC21α *NAT*) and an enhanced hyphal  
918 strain (JEC21α *gpa3Δ::NEO*) were co-cultured on YPD and V8 agar medium in  
919 the absence or the presence of equal number of cells of an intermediate hyphal a  
920 strain (XL280a). CFUs of each strain were counted before plating and after 10  
921 days of incubation to determine competition fitness.

922

923 **Figure 7. Model for the role of unisexual reproduction in foraging for**  
924 **mating partners.**

925 In the absence of the opposite mating type, the ability to undergo unisexual  
926 reproduction does not promote foraging for mating partners of the same mating  
927 type (left). In the presence of the opposite mating type, hyphal growth promotes  
928 foraging for mating partners of both the same and the opposite mating type  
929 (right). NH: no hyphal growth; LH: low hyphal growth; MH: intermediate hyphal  
930 growth; HH: high hyphal growth.

931 **Supporting information**

932 **Figure S1. Derivation of the strains used in this study.**

933 B4478 *MAT* $\alpha$ , JEC20a, XL187a, XL190 $\alpha$ , and XL280 $\alpha$  are F2 progeny from the  
934 cross between F1 progeny B3502 *MAT*a and B3501 *MAT* $\alpha$ , which were derived  
935 from a cross between the environmental isolate NIH433 *MAT*a and the clinical  
936 isolate NIH12 *MAT* $\alpha$ . JEC20a was then crossed with B4478 *MAT* $\alpha$ , and an  $\alpha$   
937 progeny was backcrossed with JEC20a. This process was repeated 9 times to  
938 yield the congenic partner B4500 JEC21 $\alpha$  of B4476 JEC20a. XL280 $\alpha$  was  
939 crossed with JEC20a, and a *MAT*a progeny was backcrossed with XL280 $\alpha$ . This  
940 process was repeated 9 times to yield the congenic partner XL280a.

941

942 **Figure S2. Hyphal growth promotes foraging for mating partners in a mini-**  
943 **colony mating assay.**

944 (A) LH, MH, HH, NH, and EH *MAT* $\alpha$  colonies derived from single cells were  
945 grown for seven days and in some cases, hyphae facilitated contact between  
946 *MAT* $\alpha$  and *MAT*a colonies. The scale bar represents 500  $\mu$ m. (B) Cell fusion  
947 frequencies between *MAT*a and *MAT* $\alpha$  mating partners for each mating pair are  
948 shown. \* indicates  $0.01 < p \leq 0.05$  and \*\* indicates  $0.001 < p \leq 0.01$  for each group  
949 analysis by one-way ANOVA.

950

951

952 **Figure S3. Pheromone response pathway activation is not correlated with**  
953 **the hyphal growth phenotype.**

954 Gene expression patterns for *MF $\alpha$* , *MFa*, *STE3 $\alpha$* , *STE3a*, *CPK1*, *MAT2*, *ZNF2*,  
955 and *PRM1* were examined by qRT PCR (NS indicates  $p \leq 0.01$ , \* indicates  
956  $0.01 < p \leq 0.05$ , \*\* indicates  $0.001 < p \leq 0.01$ , \*\*\* indicates  $0.0001 < p \leq 0.001$ , and \*\*\*\*  
957 indicates  $p \leq 0.0001$  for each pairwise comparison.). MH *MATa* (XL280a) and HH  
958 *MAT $\alpha$*  (XL190 $\alpha$ ) strains, LH *MATa* (XL187a) and MH*MAT $\alpha$*  (XL280 $\alpha$ ) strains, NH  
959 *MATa* (JEC20a) and LH *MAT $\alpha$*  (JEC21 $\alpha$ ) strains, and an enhanced hyphal *MAT $\alpha$*   
960 (JEC21 $\alpha$  *gpa3 $\Delta$ ::NEO*) strain were grown on V8 agar medium for 36 hours. The  
961 expression levels of JEC20a or JEC21 $\alpha$  were set to 1, and the remaining values  
962 of the same mating type strains were normalized to this. The error bars represent  
963 the standard deviation of the mean for three biological replicates.

964

965 **Figure S4. Exogenous pheromone has modest impact on cell-cell fusion.**

966 Cell fusion frequencies between *MATa* and *MAT $\alpha$*  cells (MH and HH, LH and  
967 MH, NH and LH, and NH and EH) co-incubated on (A) V8 and (B) YPD media for  
968 four days both in the absence and in the presence of 500 nM  $\alpha$  pheromone  
969 peptide.

970

971 **Figure S5. Enhanced unisexual reproduction results in a fitness cost**  
972 **during vegetative growth.**

973 Hyphal growth on MS medium for two weeks for *C. neoformans* strains KN99a,  
974 KN99a *gpa3Δ::NEO* #1, and KN99a *gpa3Δ::NEO* #2, and NH, LH, and EH *C.*  
975 *deneoformans* strains JEC20a, JEC21α, JEC20a *gpa3Δ::ADE2 ade2*, and  
976 JEC21α *gpa3Δ::NEO*. The scale bar represents 500 μm. Growth curves were  
977 generated using an automated Tecan Sunrise absorbance reader bi-hourly for 72  
978 hours.

979

980 **Figure S6. Experimental strategy for the fitness competition assay.**

981 Equal number of cells of α LH and α LH strains, and of α LH and α EH strains  
982 were mixed and spot-inoculated on both YPD and V8 media both in the absence  
983 and in the presence of equal number of α MH cells. Cells were scraped off agar  
984 medium after 10 days of incubation, and both yeast cells and hyphae were  
985 collected.

986 **Table S1. Bisexual cell fusion frequencies for the mating competition**  
987 **experiment.**

988 **Table S2. p-Values of one-way ANOVA analyses and Welch's t-test for each**  
989 **pairwise comparison for the foraging for mating assay during mating**  
990 **confrontation.**

991 **Table S3. p-Values of one-way ANOVA analyses and Welch's t-test for each**  
992 **pairwise comparison for the foraging for mating assay during mating**  
993 **among mini-colonies.**

994 **Table S4. Strains and plasmids used in this study.**

995 **Table S5. Primers used in this study.**

996 **Table S6. Mating competition experimental design.**

997

998

999 **Figure 1**

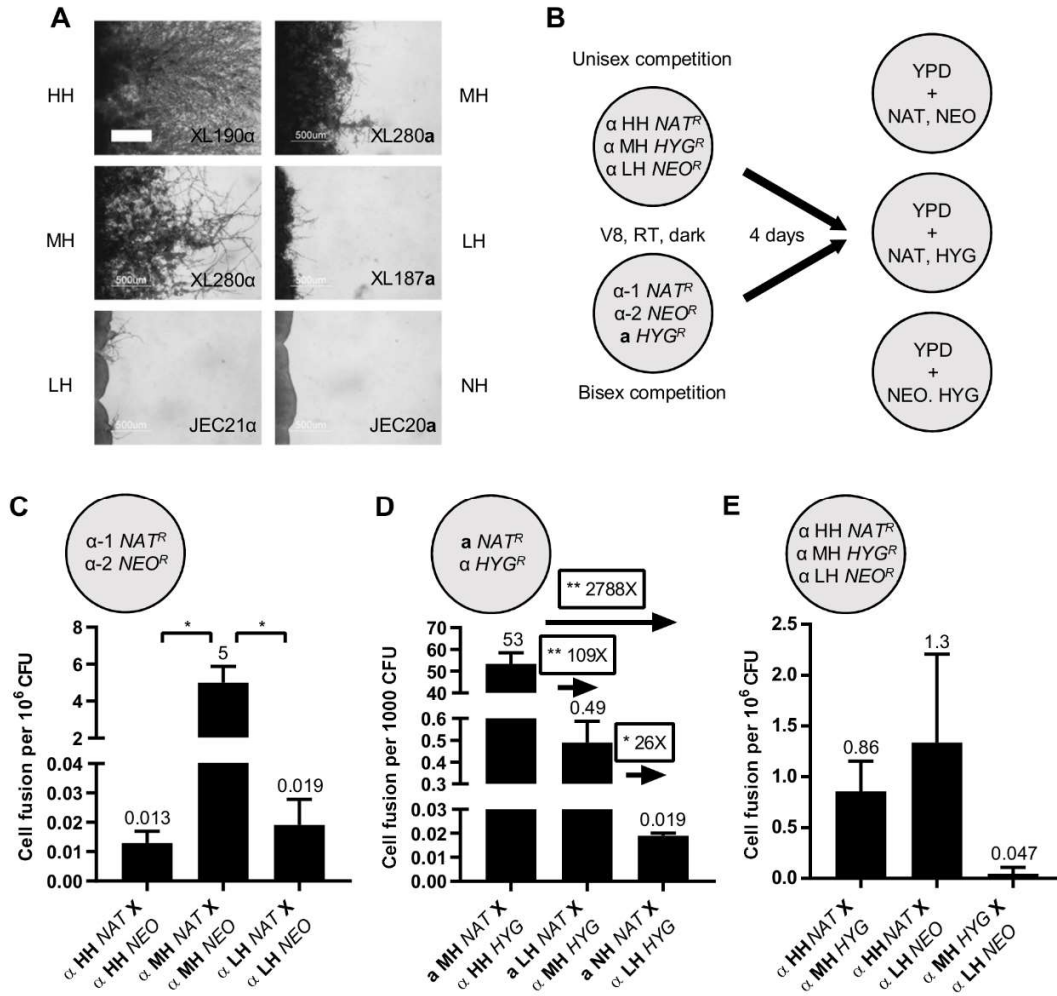

1000

1001 **Figure 2**

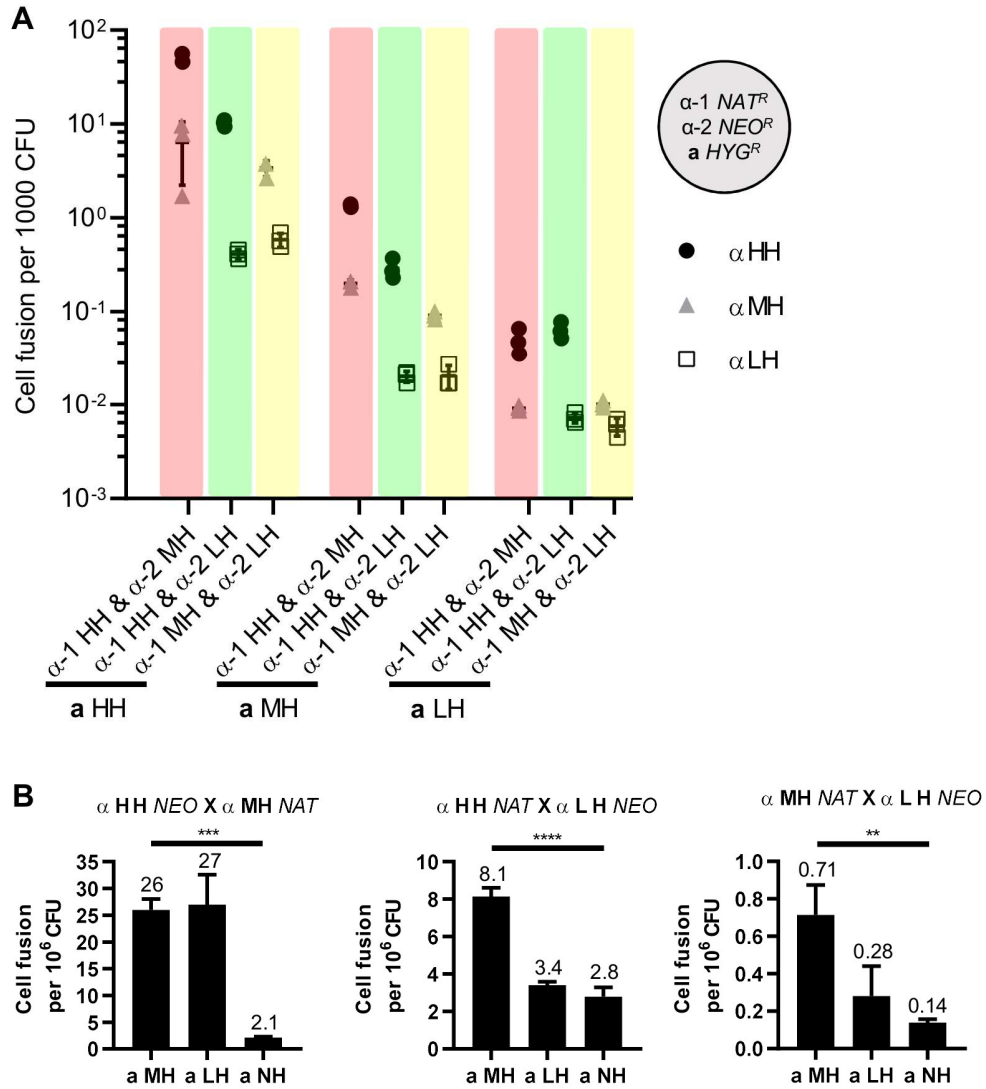

1002



1003 **Figure 3**

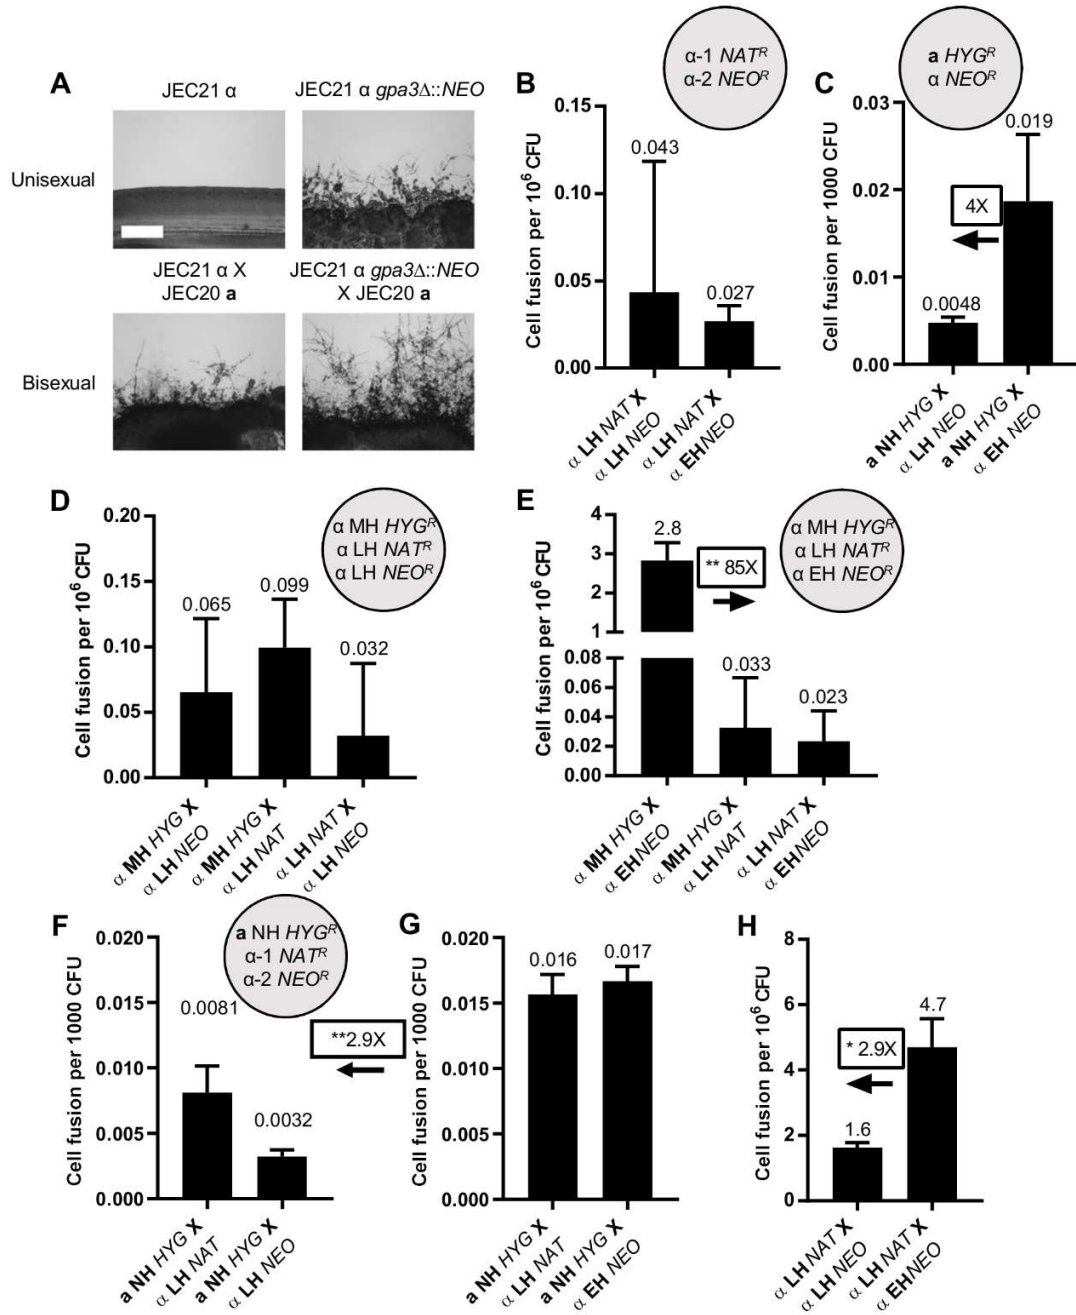

1004

1005 **Figure 4**

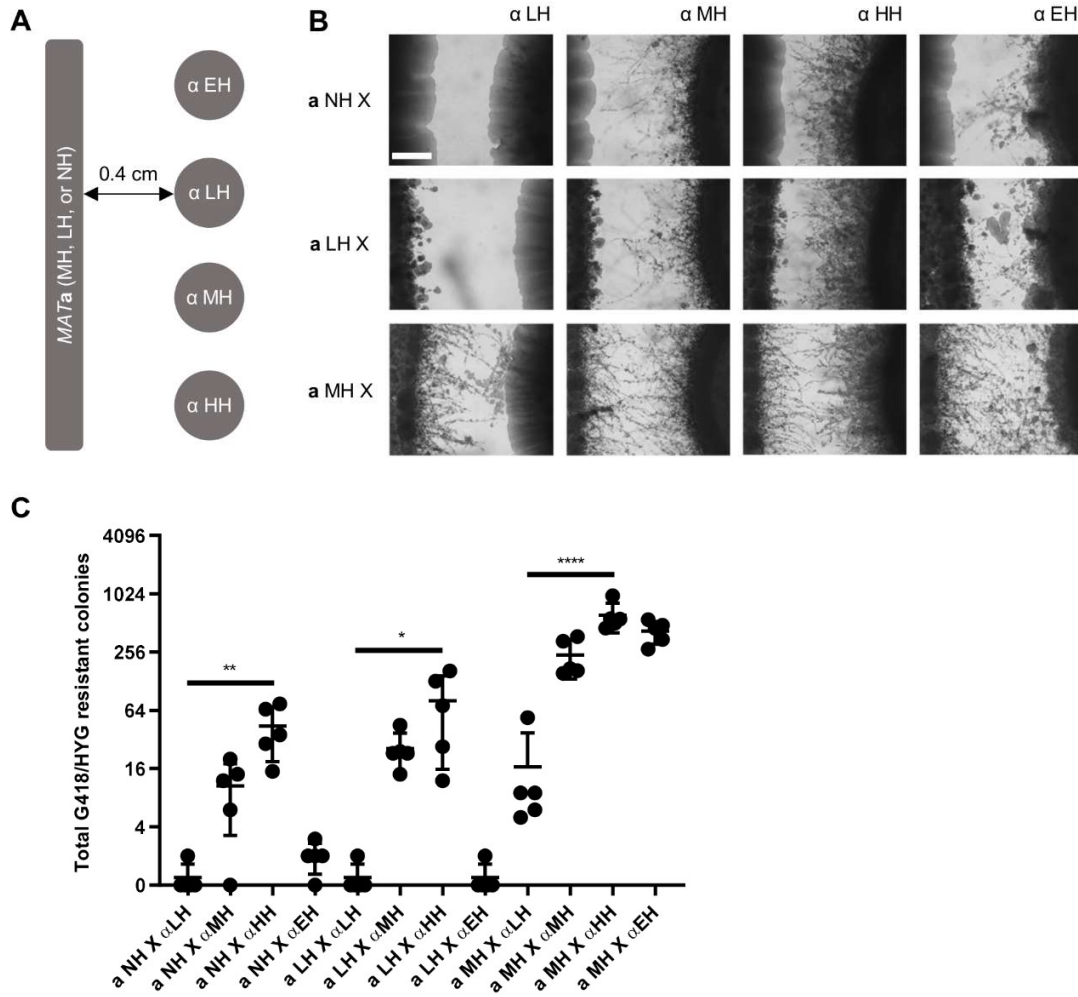

1006

1007 **Figure 5**

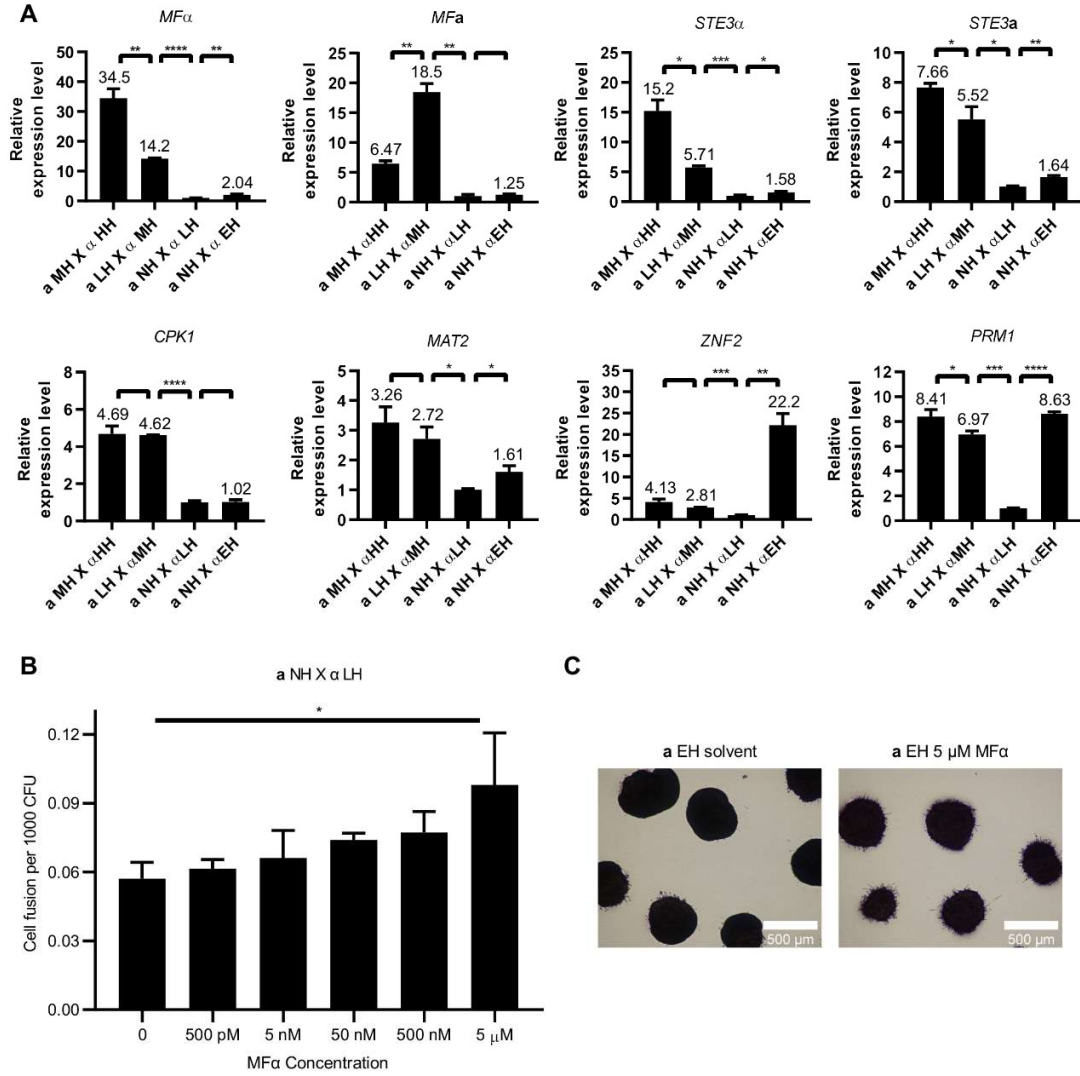

1008

1009 **Figure 6**

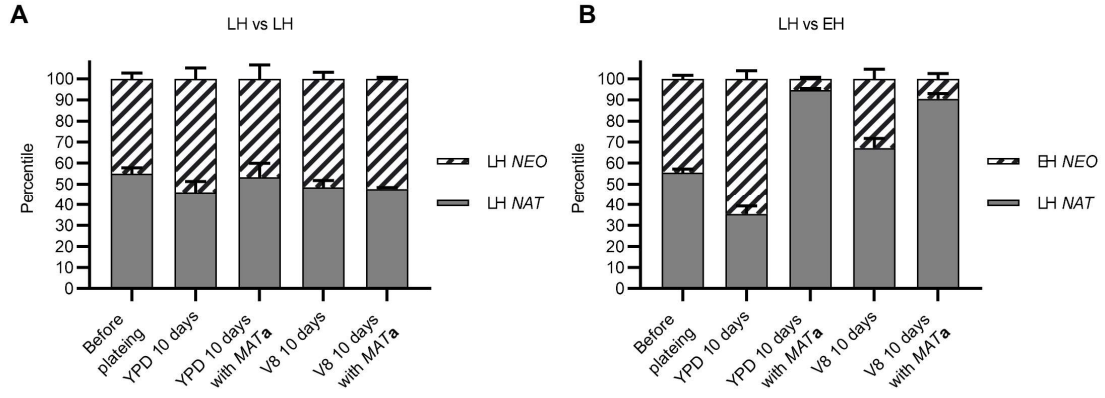

1010

1011 **Figure 7**

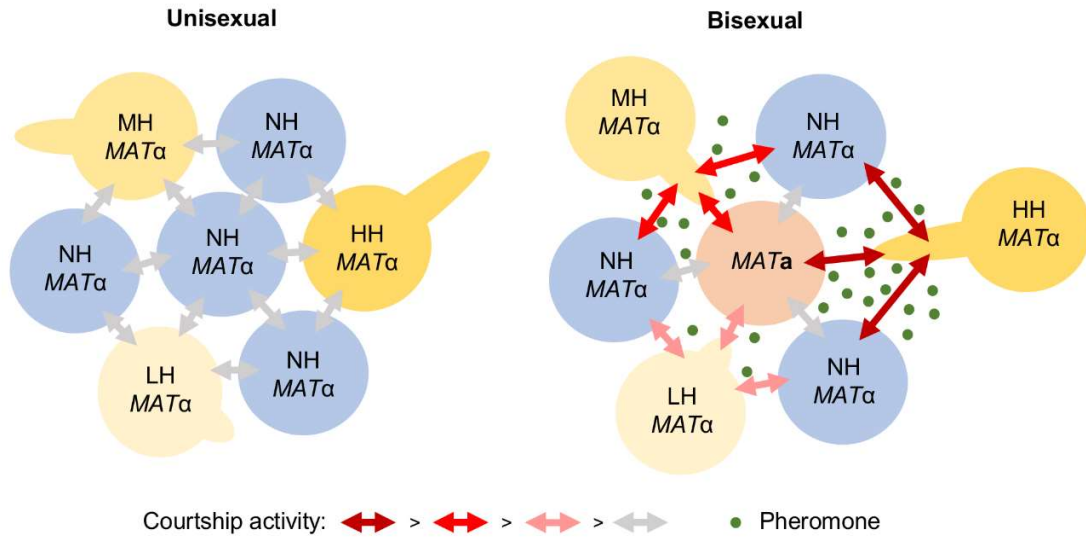

1012

1013
